# Supplementary material
Source: PubMed Central journal article supplement (PMC8771430)
Supplement: jamacardiol-e215617-s001.pdf [file jamacardiol-e215617-s001.pdf]

## Supplemental Online Content

Hauspurg A, Marsh DJ, McNeil RB, et al; NICHD nuMoM2b and NHLBI nuMoM2b Heart Health Study Networks. Association of N-terminal pro–brain natriuretic peptide concentration in early pregnancy with development of hypertensive disorders of pregnancy and future hypertension. *JAMA Cardiol*. Published online January 19, 2022. doi:10.1001/jamacardio.2021.5617

**eTable 1.** Demographic characteristics by presence of hypertension at follow-up

**eTable 2.** Demographic characteristics by presence of elevated NT-proBNP (>125 pg/mL)

**eTable 3.** Association of NT-proBNP with development of hypertension at 2 to 7 years after delivery stratified by body mass index during index pregnancy

**eTable 4.** Association of NT-proBNP with development of hypertension at 2 to 7 years after delivery stratified by race and ethnicity

**eTable 5.** Adjusted association<sup>a,b</sup> of baseline NT-proBNP<sup>c</sup> and blood pressure with adverse pregnancy outcome, including hypertensive disorders of pregnancy, spontaneous preterm birth, and small for gestational age among women with elevated NT-proBNP (>125 pg/mL)

**eTable 6.** Adjusted association<sup>a,b</sup> of baseline NT-proBNP<sup>c</sup> and blood pressure with development of hypertension at 2 to 7 years after delivery among women with elevated NT-proBNP (>125 pg/mL)

**eTable 7.** Adjusted association<sup>a,b</sup> of baseline NT-proBNP (upper vs lower quartile) and blood pressure with adverse pregnancy outcomes, including hypertensive disorders of pregnancy, spontaneous preterm birth, and small for gestational age

**eTable 8.** Adjusted association<sup>a,b</sup> of baseline NT-proBNP (upper vs lower quartile) and blood pressure with development of hypertension at 2 to 7 years after delivery

This supplementary material has been provided by the authors to give readers additional information about their work.

**eTable 1.** Demographic characteristics by presence of hypertension at follow-up

|                                                      | No hypertension<br>N=3276 | Hypertension<br>N=817 | P Value        |
|------------------------------------------------------|---------------------------|-----------------------|----------------|
| Maternal age, mean (SD), years                       | 26.9 (5.5)                | 27.4 (5.7)            | .02            |
| Maternal race: n (%)                                 |                           |                       | <i>P</i> <.001 |
| White Non-Hispanic                                   | 2119 (64.7)               | 497 (60.8)            |                |
| Black Non-Hispanic                                   | 386 (11.8)                | 131 (16.0)            |                |
| Hispanic                                             | 541 (16.5)                | 109 (13.3)            |                |
| Asian                                                | 93 (2.8)                  | 29 (3.5)              |                |
| Other                                                | 137 (4.2)                 | 51 (6.2)              |                |
| Early pregnancy BMI, median [IQR], kg/m <sup>2</sup> | 24.1 [21.7-28.0]          | 27.2 [23.5-32.7]      | <i>P</i> <.001 |
| Early pregnancy waist circumference, mean (SD), cm   | 93.6 (13.3)               | 100.5 (15.7)          | <i>P</i> <.001 |
| Family history of hypertension: n / N (%)            | 1740/3133 (55.5)          | 541/782 (69.2)        | <i>P</i> <.001 |
| Systolic blood pressure, mean (SD), mmHg             | 107.9 (10.1)              | 113.4 (10.9)          | <i>P</i> <.001 |
| Diastolic blood pressure, mean (SD), mmHg            | 66.2 (7.9)                | 70.7 (8.3)            | <i>P</i> <.001 |
| Current smoker: n / N (%)                            | 178/3261 (5.5)            | 44/811 (5.4)          | .97            |
| Early pregnancy aspirin use: n / N (%)               | 56/3273 (1.7)             | 16/816 (2.0)          | .05            |

Abbreviations: SD, standard deviation; BMI, body mass index; IQR, interquartile range.

**eTable 2.** Demographic characteristics by presence of elevated NT-proBNP (>125 pg/mL)

|                                                      | NT-proBNP ≤ 125<br>pg/mL<br><br>N=3624 | NT-proBNP > 125<br>pg/mL<br><br>N=479 | P Value        |
|------------------------------------------------------|----------------------------------------|---------------------------------------|----------------|
| Maternal age, mean (SD), years                       | 26.8 (5.6)                             | 28.2 (5.3)                            | <i>P</i> <.001 |
| Maternal race: n (%)                                 |                                        |                                       |                |
| White Non-Hispanic                                   | 2242 (61.9)                            | 377 (78.7)                            |                |
| Black Non-Hispanic                                   | 492 (13.6)                             | 28 (5.8)                              |                |
| Hispanic                                             | 602 (16.6)                             | 49 (10.2)                             | <i>P</i> <.001 |
| Asian                                                | 113 (3.1)                              | 10 (2.1)                              |                |
| Other                                                | 175 (4.8)                              | 15 (3.1)                              |                |
| Type of health insurance: n (%)                      |                                        |                                       |                |
| Commercial                                           | 2495 (69.2)                            | 392 (82.0)                            |                |
| Government/military                                  | 985 (27.3)                             | 72 (15.1)                             | <i>P</i> <.001 |
| Self-pay/other                                       | 125 (3.5)                              | 14 (2.9)                              |                |
| Early pregnancy BMI, median [IQR], kg/m <sup>2</sup> | 24.7 (22.1-29.3)                       | 23.5 (21.2-26.9)                      | <i>P</i> <.001 |
| Early pregnancy waist circumference, mean (SD), cm   | 95.3 (14.2)                            | 92.4 (12.6)                           | <i>P</i> <.001 |
| Family history of hypertension: n / N (%)            | 2013/3460 (58.2)                       | 275/464 (59.3)                        | 0.66           |
| Systolic blood pressure, mean (SD), mmHg             | 109.2 (10.6)                           | 107.1 (9.4)                           | <i>P</i> <.001 |
| Diastolic blood pressure, mean (SD), mmHg            | 67.3 (8.2)                             | 65.8 (7.6)                            | <i>P</i> <.001 |
| Gestational diabetes: n / N (%)                      | 153/3624 (4.2)                         | 15/479 (3.1)                          | 0.26           |
| Current smoker: n / N (%)                            | 200/3606 (5.5)                         | 22/476 (4.6)                          | 0.40           |
| Early pregnancy aspirin use: n / N (%)               | 63/3620 (1.7)                          | 9/479 (1.9)                           | 0.83           |
| Gestational age at delivery, median [IQR], weeks     | 39.7 (38.7-40.4)                       | 39.6 (38.7-40.4)                      | 0.72           |
| Birthweight, mean (SD), grams                        | 3280.7 (555.7)                         | 3256.5 (547.5)                        | 0.37           |

Abbreviations: SD, standard deviation; BMI, body mass index; IQR, interquartile range.

**eTable 3.** Association of NT-proBNP with development of hypertension at 2 to 7 years after delivery stratified by body mass index during index pregnancy

|                                                        | <b>NT-proBNP, per doubling in value<br/>OR (95% CI)<sup>a</sup></b> |
|--------------------------------------------------------|---------------------------------------------------------------------|
| Underweight (<18.5 kg/m <sup>2</sup> ), n=87           | 0.52 (0.24, 1.12)                                                   |
| Normal weight (18.5 to <25 kg/m <sup>2</sup> ), n=2071 | 0.77 (0.66, 0.89)                                                   |
| Overweight (25 to <30 kg/m <sup>2</sup> ), n=1006      | 0.85 (0.72, 1.00) <sup>^</sup>                                      |
| Obese (≥30 kg/m <sup>2</sup> ), n=891                  | 0.84 (0.72, 0.97)                                                   |

Abbreviations: NT-proBNP, N-terminal pro-B-type natriuretic peptide; OR, odds ratio; CI, confidence interval.

<sup>a</sup> When the confidence interval shown includes 1.00 due to rounding, the ^ symbol indicates that the precise CI includes 1 (i.e., is not statistically significant at  $p < 0.05$ ).

**eTable 4.** Association of NT-proBNP with development of hypertension at 2 to 7 years after delivery stratified by race and ethnicity

|                            | <b>NT-proBNP, per doubling in value<br/>OR (95% CI)</b> |
|----------------------------|---------------------------------------------------------|
| Non-Hispanic White, n=2595 | 0.80 (0.71, 0.90)                                       |
| Non-Hispanic Black, n=509  | 0.87 (0.70, 1.08)                                       |
| Hispanic, n=644            | 0.85 (0.68, 1.06)                                       |
| Asian, n=122               | 0.76 (0.47, 1.24)                                       |
| Other, n=185               | 0.76 (0.54, 1.08)                                       |

Abbreviations: NT-proBNP, N-terminal pro-B-type natriuretic peptide; OR, odds ratio; CI, confidence interval.

**eTable 5.** Adjusted association<sup>a,b</sup> of baseline NT-proBNP<sup>c</sup> and blood pressure with adverse pregnancy outcome, including hypertensive disorders of pregnancy, spontaneous preterm birth, and small for gestational age among women with elevated NT-proBNP (>125 pg/mL)

|                                                                           | <b>No APO</b><br><b>N=382</b> | <b>Any APO</b><br><b>N=96</b> | <b>HDP</b><br><b>N=49</b> | <b>sPTB</b><br><b>N=31</b> | <b>SGA</b><br><b>N=15</b> |
|---------------------------------------------------------------------------|-------------------------------|-------------------------------|---------------------------|----------------------------|---------------------------|
| NT-proBNP, median [IQR], pg/mL                                            | 157.0 [140.0-184.0]           | 153.5 [140.0-188.0]           | 153.0 [137.0-188.0]       | 161.0 [135.0-192.0]        | 150.0 [142.0-176.0]       |
| NT-proBNP, per doubling in value                                          | Ref                           | 1.03 (0.58, 1.83)             | 0.72 (0.30, 1.70)         | 1.35 (0.60, 3.00)          | 1.80 (0.39, 8.30)         |
| NT-proBNP, per doubling in value, controlling for systolic blood pressure | Ref                           | 1.03 (0.58, 1.83)             | 0.70 (0.30, 1.66)         | 1.43 (0.64, 3.23)          | 1.94 (0.42, 8.99)         |

Abbreviations: NT-proBNP, N-terminal pro-B-type natriuretic peptide; APO, adverse pregnancy outcome; HDP, hypertensive disorders of pregnancy; sPTB, spontaneous preterm birth; SGA, small for gestational age; IQR, interquartile range; OR, odds ratio; CI, confidence interval.

<sup>a</sup> OR (95%CI).

<sup>b</sup> Adjusted for age, race, body mass index, smoking, and aspirin use.

<sup>c</sup> This characteristic is included in statistical models after a log<sub>2</sub> (logarithm with base 2) transformation. Odds ratios for log-transformed quantities are interpreted on the multiplicative scale.

**eTable 6.** Adjusted association<sup>a,b</sup> of baseline NT-proBNP<sup>c</sup> and blood pressure with development of hypertension at 2 to 7 years after delivery among women with elevated NT-proBNP (>125 pg/mL)

|                                                                           | <b>No Hypertension<br/>N=410</b> | <b>Hypertension<br/>N=69</b> |
|---------------------------------------------------------------------------|----------------------------------|------------------------------|
| NT-proBNP, median [IQR], pg/mL                                            | 156.0 [139.0-186.0]              | 156.0 [142.0-188.0]          |
| NT-proBNP, per doubling in value                                          | Ref                              | 1.01 (0.51, 1.99)            |
| NT-proBNP, per doubling in value, controlling for systolic blood pressure | Ref                              | 1.02 (0.52, 2.01)            |

Abbreviations: NT-proBNP, N-terminal pro-B-type natriuretic peptide; IQR, interquartile range; OR, odds ratio; CI, confidence interval.

<sup>a</sup> OR (95%CI).

<sup>b</sup> Adjusted for age, race, body mass index, smoking, and aspirin use.

<sup>c</sup> This characteristic is included in statistical models after a log<sub>2</sub> (logarithm with base 2) transformation. Odds ratios for log-transformed quantities are interpreted on the multiplicative scale.

**eTable 7.** Adjusted association<sup>a,b</sup> of baseline NT-proBNP (upper vs lower quartile) and blood pressure with adverse pregnancy outcomes, including hypertensive disorders of pregnancy, spontaneous preterm birth, and small for gestational age

|                                                                                                     | <b>Any APO</b><br><b>N=909</b> | <b>HDP</b><br><b>N=544</b> | <b>sPTB</b><br><b>N=199</b> | <b>SGA</b><br><b>N=170</b> |
|-----------------------------------------------------------------------------------------------------|--------------------------------|----------------------------|-----------------------------|----------------------------|
| NT-proBNP, upper vs. lower quartile, adjusted <sup>b</sup>                                          | 0.81 (0.65, 1.01)              | 0.63 (0.48, 0.84)          | 0.99 (0.66, 1.48)           | 1.25 (0.79, 1.98)          |
| NT-proBNP, upper vs. lower quartile, controlling for systolic blood pressure, adjusted <sup>b</sup> | 0.85 (0.68, 1.06)              | 0.68 (0.51, 0.90)          | 0.99 (0.66, 1.48)           | 1.27 (0.80, 2.01)          |

<sup>a</sup> OR (95%CI).

<sup>b</sup> Adjusted for age, race, body mass index, smoking, and aspirin use.



**eTable 8.** Adjusted association<sup>a,b</sup> of baseline NT-proBNP (upper vs lower quartile) and blood pressure with development of hypertension at 2 to 7 years after delivery

|                                                                                                     | <b>No Hypertension<br/>N=3276</b> | <b>Hypertension<br/>N=817</b> |
|-----------------------------------------------------------------------------------------------------|-----------------------------------|-------------------------------|
| NT-proBNP, upper vs. lower quartile, adjusted <sup>b</sup>                                          | Ref                               | 0.66 (0.52, 0.84)             |
| NT-proBNP, upper vs. lower quartile, controlling for systolic blood pressure, adjusted <sup>b</sup> | Ref                               | 0.71 (0.56, 0.90)             |

<sup>a</sup> OR (95%CI).

<sup>b</sup> Adjusted for age, race, body mass index, smoking, and aspirin use.
