# Supplementary material
Source: PubMed Central journal article supplement (PMC8771430)
Supplement: jamacardiol-e215617-s002.pdf [file jamacardiol-e215617-s002.pdf]

\*Indicates required information. Only first name, last name, and suffix will appear in PubMed.

| <b>*Group Name(s): NICHD nuMoM2b and NHLBI nuMoM2b Heart Health Study Networks</b> |                   |                              |                  |                                                                                        |                                          |                                                         |                                                                                            |
|------------------------------------------------------------------------------------|-------------------|------------------------------|------------------|----------------------------------------------------------------------------------------|------------------------------------------|---------------------------------------------------------|--------------------------------------------------------------------------------------------|
| <b>*First Name and Middle Initial(s)</b>                                           | <b>*Last Name</b> | <b>*Suffix (eg, Jr, III)</b> | Academic Degrees | Institution                                                                            | Location (city, state/province, country) | Role or Contribution, eg, chair, principal investigator | Group (if more than 1 Group listed in the byline) and/or Subgroup (eg, Steering Committee) |
| Uma M.                                                                             | Reddy             |                              | MD, MPH          | <i>Eunice Kennedy Shriver</i> National Institute of Child Health and Human Development | Bethesda, MD, USA                        | Project scientist                                       | NICHD nuMoM2b network                                                                      |
| Marian                                                                             | Willinger         |                              | PhD              | <i>Eunice Kennedy Shriver</i> National Institute of Child Health and Human Development | Bethesda, MD, USA                        | Project officer                                         | NICHD nuMoM2b network                                                                      |
| Maurice                                                                            | Davis             |                              | DHA, MPA, MHSA   | <i>Eunice Kennedy Shriver</i> National Institute of Child Health and Human Development | Bethesda, MD, USA                        | Project officer                                         | NICHD nuMoM2b network                                                                      |
| Aaron                                                                              | Laposky           |                              | PhD              | National Heart, Lung, and Blood Institute                                              | Bethesda, MD, USA                        | Project officer                                         | NICHD nuMoM2b network                                                                      |
| Jay                                                                                | Iams              |                              | MD               | Case Western Reserve University - The MetroHealth System; The Ohio State University    | Columbus, OH                             | Subsite PI                                              | NICHD nuMoM2b network                                                                      |
| Wendy                                                                              | Dalton            |                              | RN               | Case Western Reserve University - The MetroHealth System; The Ohio State University    | Cleveland, OH                            | Study coordinator                                       | NICHD nuMoM2b network                                                                      |
| Cheryl                                                                             | Latimer           |                              | RN               | Case Western Reserve University - The MetroHealth System; The Ohio State University    | Columbus, OH                             | Study coordinator                                       | NICHD nuMoM2b network                                                                      |
| LuAnn                                                                              | Polito            |                              | RN, JD           | Case Western Reserve University - The MetroHealth System; The Ohio State University    | Cleveland, OH                            | Study coordinator                                       | NICHD nuMoM2b network                                                                      |
| Judette M.                                                                         | Louis             |                              | MD               | Case Western Reserve University - The MetroHealth System; The Ohio State University    | Cleveland, OH                            | Co-investigator                                         | NICHD nuMoM2b network                                                                      |
| Ronald                                                                             | Wapner            |                              | MD               | Columbia University / Christiana Care                                                  | New York, NY                             | Site PI                                                 | NICHD nuMoM2b network                                                                      |
| Karin                                                                              | Fuchs             |                              | MD               | Columbia University / Christiana Care                                                  | New York, NY                             | Co-investigator                                         | NICHD nuMoM2b network                                                                      |

## Supplemental Online Content: Nonauthor Collaborators

\*Indicates required information. Only first name, last name, and suffix will appear in PubMed.

| *First Name and Middle Initial(s) | *Last Name | *Suffix (eg, Jr, III) | Academic Degrees | Institution                           | Location (city, state/province, country) | Role or Contribution, eg, chair, principal investigator | Group (if more than 1 Group listed in the byline) and/or Subgroup (eg, Steering Committee) |
|-----------------------------------|------------|-----------------------|------------------|---------------------------------------|------------------------------------------|---------------------------------------------------------|--------------------------------------------------------------------------------------------|
| Caroline                          | Torres     |                       | MD               | Columbia University / Christiana Care | New York, NY                             | Study coordinator                                       | NICHD nuMoM2b network                                                                      |
| Stephanie                         | Lynch      |                       | RN, BSN, CCRC    | Columbia University / Christiana Care | Wilmington, DE                           | Study coordinator                                       | NICHD nuMoM2b network                                                                      |
| Ameneh                            | Onativia   |                       | MD               | Columbia University / Christiana Care | New York, NY                             | Co-investigator                                         | NICHD nuMoM2b network                                                                      |
| Michelle                          | DiVito     |                       | MSN, CCRC        | Columbia University / Christiana Care | New York, NY                             | Study coordinator                                       | NICHD nuMoM2b network                                                                      |
| Chia-Ling                         | Nhan-Chang |                       | MD               | Columbia University / Christiana Care | New York, NY                             | Co-investigator                                         | NICHD nuMoM2b network                                                                      |
| Robert C.                         | Basner     |                       | MD               | Columbia University / Christiana Care | New York, NY                             | Co-investigator                                         | NICHD nuMoM2b network                                                                      |
| David M.                          | Haas       |                       | MD, MS           | Indiana University                    | Indianapolis, IN                         | Site PI                                                 | NICHD nuMoM2b network                                                                      |
| Tatiana                           | Foroud     |                       | PhD              | Indiana University                    | Indianapolis, IN                         | Co-investigator                                         | NICHD nuMoM2b network                                                                      |
| Emily                             | Perkins    |                       | BS, MA, CCRP     | Indiana University                    | Indianapolis, IN                         | Study coordinator                                       | NICHD nuMoM2b network                                                                      |
| Shannon                           | Barnes     |                       | RN, MSN          | Indiana University                    | Indianapolis, IN                         | Study coordinator                                       | NICHD nuMoM2b network                                                                      |
| Alicia                            | Winters    |                       | BS               | Indiana University                    | Indianapolis, IN                         | Study coordinator                                       | NICHD nuMoM2b network                                                                      |
| Catherine L.                      | McCormick  |                       | RN               | Indiana University                    | Indianapolis, IN                         | Study coordinator                                       | NICHD nuMoM2b network                                                                      |
| Frank P.                          | Schubert   |                       | MD, MS           | Indiana University                    | Indianapolis, IN                         | Co-investigator                                         | NICHD nuMoM2b network                                                                      |
| Steve N.                          | Caritis    |                       | MD               | University of Pittsburgh              | Pittsburgh, PA                           | Co-investigator                                         | NICHD nuMoM2b network                                                                      |
| Melissa                           | Bickus     |                       | RN, BS           | University of Pittsburgh              | Pittsburgh, PA                           | Study coordinator                                       | NICHD nuMoM2b network                                                                      |
| Paul D.                           | Speer      |                       | MD               | University of Pittsburgh              | Pittsburgh, PA                           | Co-investigator                                         | NICHD nuMoM2b network                                                                      |

## Supplemental Online Content: Nonauthor Collaborators

\*Indicates required information. Only first name, last name, and suffix will appear in PubMed.

| *First Name and Middle Initial(s) | *Last Name | *Suffix (eg, Jr, III) | Academic Degrees | Institution                       | Location (city, state/province, country) | Role or Contribution, eg, chair, principal investigator | Group (if more than 1 Group listed in the byline) and/or Subgroup (eg, Steering Committee) |
|-----------------------------------|------------|-----------------------|------------------|-----------------------------------|------------------------------------------|---------------------------------------------------------|--------------------------------------------------------------------------------------------|
| Stephen P.                        | Emery      |                       | MD               | University of Pittsburgh          | Pittsburgh, PA                           | Co-investigator                                         | NICHD nuMoM2b network                                                                      |
| Ashi R.                           | Daftary    |                       | MD               | University of Pittsburgh          | Pittsburgh, PA                           | Co-investigator                                         | NICHD nuMoM2b network                                                                      |
| Francesca L.                      | Facco      |                       | MD               | University of Pittsburgh          | Pittsburgh, PA                           | Co-investigator                                         | NICHD nuMoM2b network                                                                      |
| Alan M.                           | Peaceman   |                       | MD               | Northwestern University           | Chicago, IL                              | Co-investigator                                         | NICHD nuMoM2b network                                                                      |
| Phyllis C.                        | Zee        |                       | MD, PhD          | Northwestern University           | Chicago, IL                              | Co-investigator                                         | NICHD nuMoM2b network                                                                      |
| Peggy                             | Campbell   |                       | RN, BSN, CCRC    | Northwestern University           | Chicago, IL                              | Study coordinator                                       | NICHD nuMoM2b network                                                                      |
| Jessica S.                        | Shepard    |                       | MPH              | Northwestern University           | Chicago, IL                              | Study coordinator                                       | NICHD nuMoM2b network                                                                      |
| Crystal N.                        | Williams   |                       | BA               | Northwestern University           | Chicago, IL                              | Study coordinator                                       | NICHD nuMoM2b network                                                                      |
| Deborah A.                        | Wing       |                       | MD               | University of California - Irvine | Irvine, CA                               | Site PI                                                 | NICHD nuMoM2b network                                                                      |
| Pathik D.                         | Wadhwa     |                       | MD, PhD          | University of California - Irvine | Irvine, CA                               | Co-investigator                                         | NICHD nuMoM2b network                                                                      |
| Michael P.                        | Nageotte   |                       | MD               | University of California - Irvine | Irvine, CA                               | Co-investigator                                         | NICHD nuMoM2b network                                                                      |
| Judith H.                         | Chung      |                       | MD, PhD          | University of California - Irvine | Irvine, CA                               | Co-investigator                                         | NICHD nuMoM2b network                                                                      |
| Pamela J.                         | Rumney     |                       | RNC, CCRC        | University of California - Irvine | Irvine, CA                               | Study coordinator                                       | NICHD nuMoM2b network                                                                      |
| Manuel                            | Porto      |                       | MD               | University of California - Irvine | Irvine, CA                               | Study coordinator                                       | NICHD nuMoM2b network                                                                      |
| Valerie                           | Pham       |                       | RDMS             | University of California - Irvine | Irvine, CA                               | Sonographer                                             | NICHD nuMoM2b network                                                                      |
| Samuel                            | Parry      |                       | MD               | University of Pennsylvania        | Philadelphia, PA                         | Site PI                                                 | NICHD nuMoM2b network                                                                      |

## Supplemental Online Content: Nonauthor Collaborators

\*Indicates required information. Only first name, last name, and suffix will appear in PubMed.

| <b>*First Name and Middle Initial(s)</b> | <b>*Last Name</b> | <b>*Suffix (eg, Jr, III)</b> | Academic Degrees | Institution                | Location (city, state/province, country) | Role or Contribution, eg, chair, principal investigator | Group (if more than 1 Group listed in the byline) and/or Subgroup (eg, Steering Committee) |
|------------------------------------------|-------------------|------------------------------|------------------|----------------------------|------------------------------------------|---------------------------------------------------------|--------------------------------------------------------------------------------------------|
| Jack                                     | Ludmir            |                              | MD               | University of Pennsylvania | Philadelphia, PA                         | Co-investigator                                         | NICHD nuMoM2b network                                                                      |
| Michal                                   | Elovitz           |                              | MD               | University of Pennsylvania | Philadelphia, PA                         | Co-investigator                                         | NICHD nuMoM2b network                                                                      |
| Mary                                     | Peters            |                              | BA, MPH          | University of Pennsylvania | Philadelphia, PA                         | Study coordinator                                       | NICHD nuMoM2b network                                                                      |
| Brittany                                 | Araujo            |                              | BS               | University of Pennsylvania | Philadelphia, PA                         | Study coordinator                                       | NICHD nuMoM2b network                                                                      |
| Grace                                    | Pien              |                              | MD, MSCE         | University of Pennsylvania | Philadelphia, PA                         | Co-investigator                                         | NICHD nuMoM2b network                                                                      |
| M. Sean                                  | Esplin            |                              | MD               | University of Utah         | Salt Lake City, UT                       | Co-investigator                                         | NICHD nuMoM2b network                                                                      |
| Kelly                                    | Vorwaller         |                              | RN               | University of Utah         | Salt Lake City, UT                       | Study coordinator                                       | NICHD nuMoM2b network                                                                      |
| Julie                                    | Postma            |                              | RN               | University of Utah         | Salt Lake City, UT                       | Study coordinator                                       | NICHD nuMoM2b network                                                                      |
| Valerie                                  | Morby             |                              | RN               | University of Utah         | Salt Lake City, UT                       | Study coordinator                                       | NICHD nuMoM2b network                                                                      |
| Melanie                                  | Williams          |                              | RN               | University of Utah         | Salt Lake City, UT                       | Study coordinator                                       | NICHD nuMoM2b network                                                                      |
| Linda                                    | Meadows           |                              | RN               | University of Utah         | Salt Lake City, UT                       | Study coordinator                                       | NICHD nuMoM2b network                                                                      |
| Corette B.                               | Parker            |                              | DrPH             | RTI International          | Research Triangle Park, NC               | Site PI                                                 | NICHD nuMoM2b network                                                                      |
| Matthew A.                               | Koch              |                              | MD, PhD          | RTI International          | Research Triangle Park, NC               | Co-investigator                                         | NICHD nuMoM2b network                                                                      |
| Deborah W.                               | McFadden          |                              | MBA              | RTI International          | Research Triangle Park, NC               | Project manager                                         | NICHD nuMoM2b network                                                                      |
| Barbara V.                               | Alexander         |                              | MSPH             | RTI International          | Research Triangle Park, NC               | Statistician                                            | NICHD nuMoM2b network                                                                      |
| Venkat                                   | Yetukuri          |                              | MS               | RTI International          | Research Triangle Park, NC               | Research informatician                                  | NICHD nuMoM2b network                                                                      |

## Supplemental Online Content: Nonauthor Collaborators

\*Indicates required information. Only first name, last name, and suffix will appear in PubMed.

| *First Name and Middle Initial(s) | *Last Name | *Suffix (eg, Jr, III) | Academic Degrees | Institution                                      | Location (city, state/province, country) | Role or Contribution, eg, chair, principal investigator | Group (if more than 1 Group listed in the byline) and/or Subgroup (eg, Steering Committee) |
|-----------------------------------|------------|-----------------------|------------------|--------------------------------------------------|------------------------------------------|---------------------------------------------------------|--------------------------------------------------------------------------------------------|
| Shannon                           | Hunter     |                       | MS               | RTI International                                | Research Triangle Park, NC               | Statistician                                            | NICHD nuMoM2b network                                                                      |
| Tommy E.                          | Holder     | Jr.                   | BS               | RTI International                                | Research Triangle Park, NC               | Statistician                                            | NICHD nuMoM2b network                                                                      |
| Holly                             | Franklin   |                       | MPH              | RTI International                                | Research Triangle Park, NC               | Study coordinator                                       | NICHD nuMoM2b network                                                                      |
| Martha J.                         | DeCain     |                       | BS               | RTI International                                | Research Triangle Park, NC               | Project manager                                         | NICHD nuMoM2b network                                                                      |
| Christopher                       | Griggs     |                       | BS               | RTI International                                | Research Triangle Park, NC               | Research informatician                                  | NICHD nuMoM2b network                                                                      |
| Susan                             | Redline    |                       | MD, MPH          | Harvard University, Brigham and Women's Hospital | Boston, MA                               | Site PI                                                 | NICHD nuMoM2b network                                                                      |
| Daniel                            | Mobley     |                       | RPSGT            | Harvard University, Brigham and Women's Hospital | Boston, MA                               | Co-investigator                                         | NICHD nuMoM2b network                                                                      |
| Susan                             | Surovec    |                       | BA               | Harvard University, Brigham and Women's Hospital | Boston, MA                               | Sleep technician                                        | NICHD nuMoM2b network                                                                      |
| Julianne                          | Ulanski    |                       | BS               | Harvard University, Brigham and Women's Hospital | Boston, MA                               | Sleep technician                                        | NICHD nuMoM2b network                                                                      |
| George R.                         | Saade      |                       | MD               | University of Texas Medical Branch               | Galveston, TX                            | Steering Committee chair                                | NICHD nuMoM2b network                                                                      |
